# Supplementary material for: Are Kidneys Affected by SARS-CoV-2 Infection? An Updated Review on COVID-19-Associated AKI
Source: MDPI journal article supplement (doi:10.3390/pathogens13040325), 2024-04-16
Supplement: s1 [file s1]

**Supplementary Table S1. Acute kidney injury (AKI) in hospitalized patients with SARS-CoV-2 infection: study and type design of reports.**

| <b>Authors</b>              | <b>Study design and country</b>                                                                                                                                                                      |
|-----------------------------|------------------------------------------------------------------------------------------------------------------------------------------------------------------------------------------------------|
| <b>Xu S, et al.</b>         | Retrospective study of patient admitted to two hospitals (from Hubei and Anhui provinces, China)                                                                                                     |
| <b>Li X, et al.</b>         | Retrospective survey of patients admitted to Tongji Hospital (Wuhan, China)                                                                                                                          |
| <b>Li Q, et al.</b>         | Single-center survey on patients hospitalized in Shanghai Public Health Clinical Center, China                                                                                                       |
| <b>Pei G, et al.</b>        | Retrospective, single-center review from electronic health records (Wuhan, China)                                                                                                                    |
| <b>Fisher M, et al.</b>     | Retrospective, observational study at MHS (Montefiore Health System (Bronx, NYC, NY, US)                                                                                                             |
| <b>Argenziano M, et al.</b> | Retrospective manual medical record review from NewYork-Presbyterian/Columbia University Irving Medical Center, New York City (US)                                                                   |
| <b>Suleyman G, et al.</b>   | Case series of consecutive patients with COVID-19 evaluated at Henry Ford Health System in metropolitan Detroit, Michigan (US)                                                                       |
| <b>Kolhe N, et al.</b>      | Investigator-initiated, multicenter, retrospective cohort study from Research and Development Department of University Hospitals of Derby and Burton (UHDB) National Health Service (NHS) Trust (UK) |
| <b>Guan W, et al.</b>       | Updated analysis of cases throughout mainland China (552 hospitals)                                                                                                                                  |
| <b>Cheng Y, et al.</b>      | Prospective, cohort study of patients with COVID-19 admitted in a tertiary teaching hospital that also encompassed three affiliates following a major outbreak (2020) in Wuhan (China)               |
| <b>Zahid U, et al.</b>      | Single-center retrospective cohort study (Brookdale, NY) (US)                                                                                                                                        |
| <b>Chan L, et al.</b>       | Retrospective, observational review from electronic health records (Mount Sinai COVID Informatics Center, MSCIC) (New York City, NY, US)                                                             |
| <b>Xu H, et al.</b>         | Retrospective, observational study at 2 geriatric clinics (Stockholm, Sweden)                                                                                                                        |
| <b>Ng J, et al.</b>         | Retrospective, cohort study, from 13 hospitals from electronic health records (Allscripts) (metropolitan New York) (US)                                                                              |
| <b>Gameiro J, et al.</b>    | Retrospective, single-center analysis (Lisbon, Portugal)                                                                                                                                             |
| <b>Walendy V, et al.</b>    | Nationwide, retrospective, population-based data on hospitalizations (with COVID-19 and AKI) in Germany                                                                                              |
| <b>Morieri M, et al.</b>    | International, multicenter, retrospective study (Padua, Italy and Moscow, Russia)                                                                                                                    |
| <b>Fabrizi F, et al.</b>    | Single-center, retrospective survey (Milano, Italy)                                                                                                                                                  |
| <b>Yoo Y, et al.</b>        | Retrospective analysis of patients from the National COVID Cohort Collaborative (N3C) (US)                                                                                                           |
| <b>Tan B, et al.</b>        | Multicenter, observational cohort study from the Consortium for Clinical Characterization of COVID-19 by EHR (electronic health record) (4CE) (US, Spain, Italy, France, Germany, Singapore)         |
| <b>Kim S, et al.</b>        | Single-center, retrospective, observational study (Seoul and Pyeongtaek, Republic of Korea)                                                                                                          |

|                              |                                                                                     |
|------------------------------|-------------------------------------------------------------------------------------|
| <b>Shchepalina A, et al.</b> | Single-center, (retrospective), observational study (Tareev Clinic, Moscow, Russia) |
| <b>Palomba H, et al.</b>     | Multi-center, retrospective, observational study (23 private hospitals, Brazil)     |
| <b>McNicholas B, et al.</b>  | Multi-center, prospective, observational survey (CCCC and LUNG-SAFE studies)        |
